# Supplementary material for: Evaluation of Rapid Immunochromatographic Tests for the Direct Detection of Extended Spectrum Beta-Lactamases and Carbapenemases in Enterobacterales Isolated from Positive Blood Cultures
Source: PubMed Central journal article supplement (PMC8653814; doi:10.1128/spectrum.00785-21), 2021-12-08
Supplement: spectrum00785-21_supp_1_seq1.pdf [file spectrum00785-21_supp_1_seq1.pdf]

**Supplementary Table 1. Comparison of NG-Test CTX-M MULTI and NG-Test Carba 5 results with reference results**

| Sample number                                                                                     | Organism Identification by MALDI-TOF | NG-Test CTX-M Multi Results | NG-Test Carba 5 Results | BD Phoenix 100 ESBL Results | BD Phoenix 100 CPO Detect Results | Easyplex SuperBug CRE Results | Cepheid Carba-R PCR Results |
|---------------------------------------------------------------------------------------------------|--------------------------------------|-----------------------------|-------------------------|-----------------------------|-----------------------------------|-------------------------------|-----------------------------|
| Isolates (1-32) were spiked in BD BACTEC bottles to verify the performance of NG-Test CTX-M Multi |                                      |                             |                         |                             |                                   |                               |                             |
| 1.                                                                                                | <i>Salmonella typhi</i>              | Positive                    | ND                      | Positive                    | Negative                          | Positive                      | ND                          |
| 2.                                                                                                | <i>Salmonella typhi</i>              | Positive                    | ND                      | Positive                    | Negative                          | Positive                      | ND                          |
| 3.                                                                                                | <i>Escherichia coli</i>              | Positive                    | ND                      | Positive                    | Negative                          | Positive                      | ND                          |
| 4.                                                                                                | <i>Escherichia coli</i>              | Positive                    | ND                      | Positive                    | Negative                          | Positive                      | ND                          |
| 5.                                                                                                | <i>Escherichia coli</i>              | Positive                    | ND                      | Positive                    | Negative                          | Positive                      | ND                          |
| 6.                                                                                                | <i>Escherichia coli</i>              | Positive                    | ND                      | Positive                    | Negative                          | Positive                      | ND                          |
| 7.                                                                                                | <i>Escherichia coli</i>              | Positive                    | ND                      | Positive                    | Negative                          | Positive                      | ND                          |
| 8.                                                                                                | <i>Escherichia coli</i>              | Positive                    | ND                      | Positive                    | Negative                          | ND                            | ND                          |
| 9.                                                                                                | <i>Escherichia coli</i>              | Positive                    | ND                      | Positive                    | Negative                          | ND                            | ND                          |
| 10.                                                                                               | <i>Escherichia coli</i>              | Positive                    | ND                      | Positive                    | Negative                          | ND                            | ND                          |
| 11.                                                                                               | <i>Escherichia coli</i>              | Positive                    | ND                      | Positive                    | Negative                          | ND                            | ND                          |
| 12.                                                                                               | <i>Escherichia coli</i>              | Positive                    | ND                      | Positive                    | Negative                          | ND                            | ND                          |
| 13.                                                                                               | <i>Klebsiella pneumoniae</i>         | Positive                    | ND                      | Positive                    | Negative                          | Positive                      | ND                          |
| 14.                                                                                               | <i>Klebsiella pneumoniae</i>         | Positive                    | ND                      | Positive                    | Negative                          | Positive                      | ND                          |
| 15.                                                                                               | <i>Klebsiella pneumoniae</i>         | Positive                    | ND                      | Positive                    | Negative                          | Positive                      | ND                          |
| 16.                                                                                               | <i>Klebsiella pneumoniae</i>         | Positive                    | ND                      | Positive                    | Negative                          | Positive                      | ND                          |
| 17.                                                                                               | <i>Klebsiella pneumoniae</i>         | Positive                    | ND                      | Positive                    | Negative                          | Positive                      | ND                          |
| 18.                                                                                               | <i>Klebsiella pneumoniae</i>         | Positive                    | ND                      | Positive                    | Negative                          | ND                            | ND                          |
| 19.                                                                                               | <i>Klebsiella pneumoniae</i>         | Positive                    | ND                      | Positive                    | Negative                          | ND                            | ND                          |
| 20.                                                                                               | <i>Klebsiella pneumoniae</i>         | Positive                    | ND                      | Positive                    | Negative                          | ND                            | ND                          |
| 21.                                                                                               | <i>Serratia marcescens</i>           | Negative                    | ND                      | Negative                    | Negative                          | ND                            | ND                          |
| 22.                                                                                               | <i>Serratia marcescens</i>           | Negative                    | ND                      | Negative                    | Negative                          | ND                            | ND                          |

|                                                                                                |                              |          |                                   |          |              |          |                                   |
|------------------------------------------------------------------------------------------------|------------------------------|----------|-----------------------------------|----------|--------------|----------|-----------------------------------|
| 23.                                                                                            | <i>Serratia marcescens</i>   | Negative | ND                                | Negative | Negative     | ND       | ND                                |
| 24.                                                                                            | <i>Enterobacter cloacae</i>  | Negative | ND                                | Negative | Negative     | ND       | ND                                |
| 25.                                                                                            | <i>Escherichia coli</i>      | Negative | ND                                | Negative | Negative     | Negative | ND                                |
| 26.                                                                                            | <i>Escherichia coli</i>      | Negative | ND                                | Negative | Negative     | Negative | ND                                |
| 27.                                                                                            | <i>Escherichia coli</i>      | Negative | ND                                | Negative | Negative     | Negative | ND                                |
| 28.                                                                                            | <i>Klebsiella pneumoniae</i> | Negative | ND                                | Negative | Negative     | Negative | ND                                |
| 29.                                                                                            | <i>Klebsiella pneumoniae</i> | Negative | ND                                | Negative | Negative     | Negative | ND                                |
| 30.                                                                                            | <i>Klebsiella pneumoniae</i> | Negative | ND                                | Negative | Negative     | Negative | ND                                |
| 31.                                                                                            | <i>Klebsiella pneumoniae</i> | Negative | ND                                | Negative | Negative     | Negative | ND                                |
| 32.                                                                                            | <i>Klebsiella pneumoniae</i> | Negative | ND                                | Negative | Negative     | ND       | ND                                |
| Isolates (33-65) were spiked in BD BACTEC bottles to verify the performance of NG-Test Carba 5 |                              |          |                                   |          |              |          |                                   |
| 33.                                                                                            | <i>Escherichia coli</i>      | ND       | Positive OXA-48-like              | Negative | Class D CPO  | ND       | Positive OXA-48-like              |
| 34.                                                                                            | <i>Escherichia coli</i>      | ND       | Positive OXA-48-like              | Negative | Class D CPO  | ND       | Positive OXA-48-like              |
| 35.                                                                                            | <i>Escherichia coli</i>      | ND       | Positive NDM-like                 | Negative | Class B CPO  | ND       | Positive NDM-like                 |
| 36.                                                                                            | <i>Escherichia coli</i>      | ND       | Positive NDM-like                 | Negative | Class B CPO  | ND       | Positive NDM-like                 |
| 37.                                                                                            | <i>Escherichia coli</i>      | ND       | Positive NDM-like                 | Negative | Class B CPO  | ND       | Positive NDM-like                 |
| 38.                                                                                            | <i>Escherichia coli</i>      | ND       | Positive NDM-like                 | Negative | Class B CPO  | ND       | Positive NDM-like                 |
| 39.                                                                                            | <i>Escherichia coli</i>      | ND       | Positive IMP-like                 | Negative | Class B CPO  | ND       | Positive IMP-like                 |
| 40.                                                                                            | <i>Escherichia coli</i>      | ND       | Positive IMP-like and VIM1-like   | Negative | Class B CPO  | ND       | Positive IMP-like and VIM1-like   |
| 41.                                                                                            | <i>Klebsiella pneumoniae</i> | ND       | Positive KPC-like                 | Negative | Class A CPO  | ND       | Positive KPC-like                 |
| 42.                                                                                            | <i>Klebsiella pneumoniae</i> | ND       | Positive VIM1-like                | Negative | Class B CPO  | ND       | Positive VIM1-like                |
| 43.                                                                                            | <i>Klebsiella pneumoniae</i> | ND       | Positive OXA-48-like and NDM-like | Negative | CPO Producer | ND       | Positive OXA-48-like and NDM-like |
| 44.                                                                                            | <i>Klebsiella pneumoniae</i> | ND       | Positive OXA-48-like and NDM-like | Negative | CPO Producer | ND       | Positive OXA-48-like and NDM-like |
| 45.                                                                                            | <i>Klebsiella pneumoniae</i> | ND       | Positive OXA-48-like and NDM-like | Negative | CPO Producer | ND       | Positive OXA-48-like and NDM-like |

|                                                                                                                            |                              |          |                                 |          |             |    |                                 |
|----------------------------------------------------------------------------------------------------------------------------|------------------------------|----------|---------------------------------|----------|-------------|----|---------------------------------|
| 46.                                                                                                                        | <i>Klebsiella pneumoniae</i> | ND       | Positive OXA-48-like            | Negative | Class D CPO | ND | Positive OXA-48-like            |
| 47.                                                                                                                        | <i>Klebsiella pneumoniae</i> | ND       | Positive OXA-48-like            | Negative | Class D CPO | ND | Positive OXA-48-like            |
| 48.                                                                                                                        | <i>Klebsiella pneumoniae</i> | ND       | Positive NDM-like               | Negative | Class B CPO | ND | Positive NDM-like               |
| 49.                                                                                                                        | <i>Klebsiella pneumoniae</i> | ND       | Positive IMP-like and VIM1-like | Negative | Class B CPO | ND | Positive IMP-like and VIM1-like |
| 50.                                                                                                                        | <i>Klebsiella pneumoniae</i> | ND       | Negative                        | Negative | Negative    | ND | Negative                        |
| 51.                                                                                                                        | <i>Klebsiella pneumoniae</i> | ND       | Negative                        | Negative | Negative    | ND | Negative                        |
| 52.                                                                                                                        | <i>Klebsiella pneumoniae</i> | ND       | Negative                        | Negative | Negative    | ND | Negative                        |
| 53.                                                                                                                        | <i>Klebsiella pneumoniae</i> | ND       | Negative                        | Negative | Negative    | ND | Negative                        |
| 54.                                                                                                                        | <i>Klebsiella pneumoniae</i> | ND       | Negative                        | Negative | Negative    | ND | Negative                        |
| 55.                                                                                                                        | <i>Escherichia coli</i>      | ND       | Negative                        | Positive | Negative    | ND | Negative                        |
| 56.                                                                                                                        | <i>Escherichia coli</i>      | ND       | Negative                        | Positive | Negative    | ND | Negative                        |
| 57.                                                                                                                        | <i>Escherichia coli</i>      | ND       | Negative                        | Negative | Negative    | ND | Negative                        |
| 58.                                                                                                                        | <i>Escherichia coli</i>      | ND       | Negative                        | Negative | Negative    | ND | Negative                        |
| 59.                                                                                                                        | <i>Escherichia coli</i>      | ND       | Negative                        | Negative | Negative    | ND | Negative                        |
| 60.                                                                                                                        | <i>Escherichia coli</i>      | ND       | Negative                        | Negative | Negative    | ND | Negative                        |
| 61.                                                                                                                        | <i>Escherichia coli</i>      | ND       | Negative                        | Negative | Negative    | ND | Negative                        |
| 62.                                                                                                                        | <i>Serratia marcescens</i>   | ND       | Negative                        | Negative | Negative    | ND | Negative                        |
| 63.                                                                                                                        | <i>Serratia marcescens</i>   | ND       | Negative                        | Negative | Negative    | ND | Negative                        |
| 64.                                                                                                                        | <i>Serratia marcescens</i>   | ND       | Negative                        | Negative | Negative    | ND | Negative                        |
| 65.                                                                                                                        | <i>Enterobacter cloacae</i>  | ND       | Negative                        | Negative | Negative    | ND | Negative                        |
| Isolates (66-114) are positive blood culture that were tested prospectively with both NG CTX-M Multi test and Carba 5 test |                              |          |                                 |          |             |    |                                 |
| 66.                                                                                                                        | <i>Escherichia coli</i>      | Positive | Negative                        | Positive | Negative    | ND | ND                              |
| 67.                                                                                                                        | <i>Escherichia coli</i>      | Positive | Negative                        | Positive | Negative    | ND | ND                              |
| 68.                                                                                                                        | <i>Escherichia coli</i>      | Negative | Positive OXA-48-like            | Negative | Class D CPO | ND | ND                              |
| 69.                                                                                                                        | <i>Escherichia coli</i>      | Negative | Positive NDM-like               | Negative | Class B CPO | ND | ND                              |

|     |                              |          |          |           |          |    |    |
|-----|------------------------------|----------|----------|-----------|----------|----|----|
| 70. | <i>Escherichia coli</i>      | Negative | Negative | Negative  | Negative | ND | ND |
| 71. | <i>Escherichia coli</i>      | Negative | Negative | Negative  | Negative | ND | ND |
| 72. | <i>Escherichia coli</i>      | Negative | Negative | Negative  | Negative | ND | ND |
| 73. | <i>Escherichia coli</i>      | Negative | Negative | Negative  | Negative | ND | ND |
| 74. | <i>Escherichia coli</i>      | Negative | Negative | Negative  | Negative | ND | ND |
| 75. | <i>Escherichia coli</i>      | Negative | Negative | Negative  | Negative | ND | ND |
| 76. | <i>Escherichia coli</i>      | Negative | Negative | Negative  | Negative | ND | ND |
| 77. | <i>Escherichia coli</i>      | Negative | Negative | Negative  | Negative | ND | ND |
| 78. | <i>Klebsiella pneumoniae</i> | Positive | Negative | Negative* | Negative | ND | ND |
| 79. | <i>Klebsiella pneumoniae</i> | Positive | Negative | Negative* | Negative | ND | ND |
| 80. | <i>Klebsiella pneumoniae</i> | Positive | Negative | Positive  | Negative | ND | ND |
| 81. | <i>Klebsiella pneumoniae</i> | Negative | Negative | Negative  | Negative | ND | ND |
| 82. | <i>Klebsiella pneumoniae</i> | Negative | Negative | Negative  | Negative | ND | ND |
| 83. | <i>Klebsiella pneumoniae</i> | Negative | Negative | Negative  | Negative | ND | ND |
| 84. | <i>Klebsiella pneumoniae</i> | Negative | Negative | Negative  | Negative | ND | ND |
| 85. | <i>Klebsiella pneumoniae</i> | Negative | Negative | Negative  | Negative | ND | ND |
| 86. | <i>Klebsiella pneumoniae</i> | Negative | Negative | Negative  | Negative | ND | ND |
| 87. | <i>Klebsiella pneumoniae</i> | Negative | Negative | Negative  | Negative | ND | ND |
| 88. | <i>Klebsiella pneumoniae</i> | Negative | Negative | Negative  | Negative | ND | ND |
| 89. | <i>Klebsiella pneumoniae</i> | Negative | Negative | Negative  | Negative | ND | ND |
| 90. | <i>Klebsiella pneumoniae</i> | Negative | Negative | Negative  | Negative | ND | ND |
| 91. | <i>Klebsiella pneumoniae</i> | Negative | Negative | Negative  | Negative | ND | ND |
| 92. | <i>Klebsiella pneumoniae</i> | Negative | Negative | Negative  | Negative | ND | ND |
| 93. | <i>Klebsiella pneumoniae</i> | Negative | Negative | Negative  | Negative | ND | ND |
| 94. | <i>Klebsiella pneumoniae</i> | Negative | Negative | Negative  | Negative | ND | ND |
| 95. | <i>Klebsiella pneumoniae</i> | Negative | Negative | Negative  | Negative | ND | ND |
| 96. | <i>Klebsiella pneumoniae</i> | Negative | Negative | Negative  | Negative | ND | ND |

|      |                                  |          |          |           |          |    |    |
|------|----------------------------------|----------|----------|-----------|----------|----|----|
| 97.  | <i>Klebsiella pneumoniae</i>     | Negative | Negative | Negative  | Negative | ND | ND |
| 98.  | <i>Klebsiella pneumoniae</i>     | Negative | Negative | Negative  | Negative | ND | ND |
| 99.  | <i>Klebsiella oxytoca</i>        | Negative | Negative | Negative  | Negative | ND | ND |
| 100. | <i>Klebsiella variicola</i> .    | Negative | Negative | Negative  | Negative | ND | ND |
| 101. | <i>Enterobacter cloacae</i>      | Positive | Negative | Negative* | Negative | ND | ND |
| 102. | <i>Enterobacter cloacae</i>      | Negative | Negative | Negative  | Negative | ND | ND |
| 103. | <i>Enterobacter cloacae</i>      | Negative | Negative | Negative  | Negative | ND | ND |
| 104. | <i>Enterobacter cloacae</i>      | Negative | Negative | Negative  | Negative | ND | ND |
| 105. | <i>Enterobacter cloacae</i>      | Negative | Negative | Negative  | Negative | ND | ND |
| 106. | <i>Enterobacter cloacae</i>      | Negative | Negative | Negative  | Negative | ND | ND |
| 107. | <i>Serratia marcescens</i>       | Negative | Negative | Negative  | Negative | ND | ND |
| 108. | <i>Serratia marcescens</i>       | Negative | Negative | Negative  | Negative | ND | ND |
| 109. | <i>Serratia marcescens</i>       | Negative | Negative | Negative  | Negative | ND | ND |
| 110. | <i>Serratia marcescens</i>       | Negative | Negative | Negative  | Negative | ND | ND |
| 111. | <i>Serratia marcescens</i>       | Negative | Negative | Negative  | Negative | ND | ND |
| 112. | <i>Serratia marcescens</i>       | Negative | Negative | Negative  | Negative | ND | ND |
| 113. | <i>Salmonella spp. not typhi</i> | Negative | Negative | Negative  | Negative | ND | ND |
| 114. | <i>Proteus mirabilis</i>         | Negative | Negative | Negative  | Negative | ND | ND |

ND = Not Done

\*Flagged as possible ESBLs by BDxpert, Confirmed by manual susceptibility method as an ESBL producer

Inoculum source is pellet from positive blood cultures for NG-Test CTX-M and NG-Test Carba 5

Inoculum source is isolated colonies from culture for BD Phoenix tests and Cepheid Carba-R PCR

Inoculum source is aliquot from the positive blood cultures for Easyplex SuperBug CRE Result
